# Supplementary material for: Synthesis and Performance of an Acrylamide Copolymer Containing Nano‐SiO2 as Enhanced Oil Recovery Chemical
Source: Hindawi journal article supplement (doi:10.1155/2013/437309), 2013-01-01
Supplement: f1 [file 437309.f1.zip]

# 1. Weight-Average Molecular Weight

As shown in Figure 1 and 2, the weight-average molecular weight of AM/AA and AM/AA/NSFM is  $1.33 \times 10^7$  g/mol and  $1.32 \times 10^7$  g/mol, respectively.

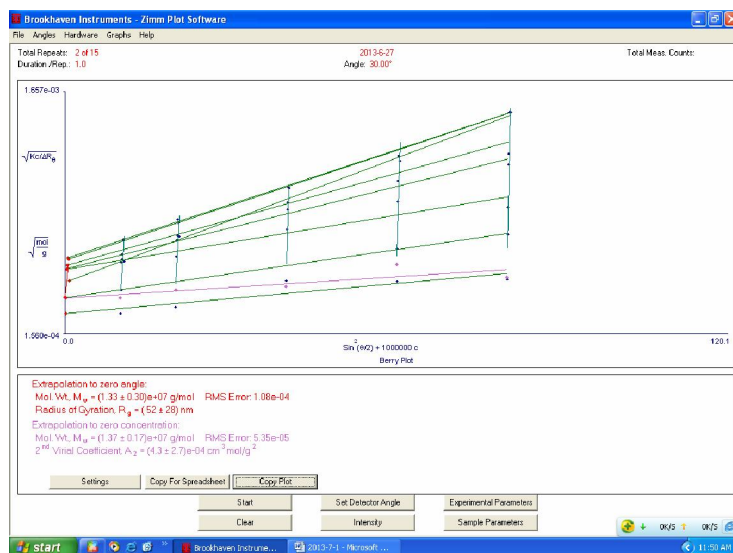

Figure 1: Weight-average molecular weight of AM/AA

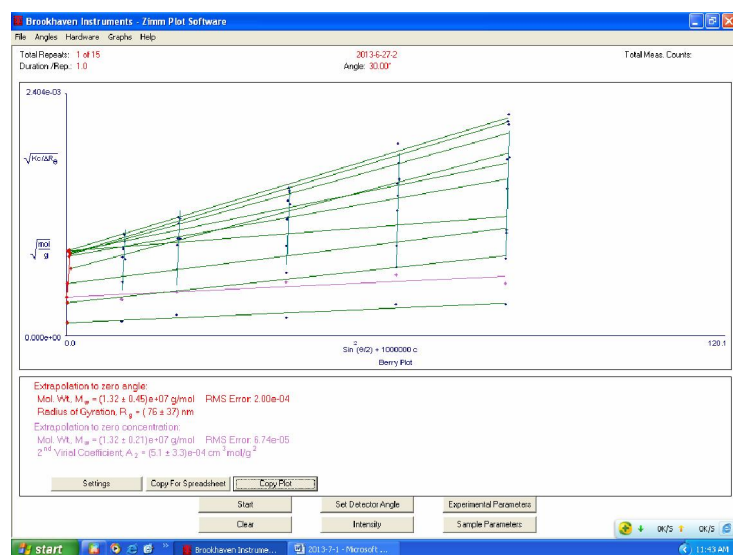

Figure 2: Weight-average molecular weight of AM/AA/NSFM

## 2. Retention of Copolymers

### 2.1 Chemicals and reagents

Sodium formate, aluminum sulfate hydrate, sodium acetate trihydrate, starch soluble, cadmium

iodide, bromine, acetic acid, and sodium chloride were analytical reagent.

## **2.2 Preparation of buffer solution**

25 g sodium acetate trihydrate, 0.7 g aluminum sulfate hydrate and 800 mL distilled water were added into a 1000 mL capacity bottle, and then the pH of the mixture was regulated to 4.0 with acetic acid. Finally, a certain amount of distilled water was added into the capacity bottle until 1000 mL solution was obtained.

## **2.3 Preparation of starch-cadmium iodide solution**

25 g cadmium iodide and 800 mL distilled water were added into a 1000 mL capacity bottle, and then the solution was heated to 100 °C for 10 minutes. 2.0 g starch soluble were added and stirred vigorously for 5 minutes, and then a certain amount of distilled water was added into the capacity bottle until 1000 mL solution was obtained.

## **2.4 Standard curve**

0, 0.1, 0.2, 0.4, 0.6, 0.8, and 1.0 mL 300 mg/L copolymer solution were added into seven 50 mL capacity bottles, respectively. And then 30 mL 0.5 wt % sodium chloride solution, 5 mL buffer solution, 1 mL bromine, 5 mL sodium formate, and 5 mL starch-cadmium iodide solution were added into these capacity bottles, respectively. A certain amount of 0.5 wt % sodium chloride solution was added into these capacity bottles until 50 mL solutions were obtained. The absorbance was measured with a spectrophotometer at 590 nm. The reference solution was 0.5 wt % sodium chloride solution. The standard curves of the copolymers are shown in Figure 3.

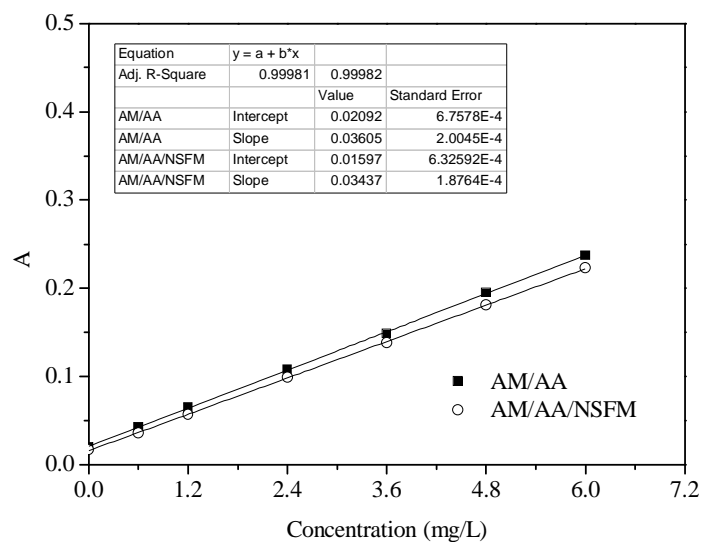

**Figure 3:** Standard curves of AM/AA and AM/AA/NSFM solutions

## 2.5 Retention of copolymer

0.5 mL discharged copolymer solution and 199.5 mL sodium chloride solution (0.5wt %) were added into a 500 mL beaker, then the solution was stirred vigorously for 10 minutes and the dilute solution was obtained. The absorbance of AM/AA and AM/AA/NSFM dilute solutions were 0.195 and 0.179, respectively. So the concentration of AM/AA and AM/AA/NSFM dilute solutions were 4.83 mg/L and 4.74 mg/L, respectively.

**Table 1:** Retention of AM/AA and AM/AA/NSFM

| Copolymer  | Injected copolymer solution |                      | Discharged copolymer solution |                      | Retention (mg) |
|------------|-----------------------------|----------------------|-------------------------------|----------------------|----------------|
|            | Volume (mL)                 | Concentration (mg/L) | Volume (mL)                   | Concentration (mg/L) |                |
| AM/AA      | 691                         | 2000                 | 687                           | 1932                 | 55             |
| AM/AA/NSFM | 702                         | 2000                 | 696                           | 1897                 | 83             |
