# Supplementary material for: Synthesis and Performance of an Acrylamide Copolymer Containing Nano‐SiO2 as Enhanced Oil Recovery Chemical
Source: Hindawi journal article supplement (doi:10.1155/2013/437309), 2013-01-01
Supplement: f1 [file 437309.f1.zip]

Archive with 5 entries (4 files):
- Supplementary Materials/Revision Notes(437309).pdf
- Supplementary Materials/Supporting Information(437309).doc
- Supplementary Materials/Supporting Information(437309).pdf
- Supplementary Materials/Synthesis and Performance of an Acrylamide Copolymer Containing Nano-SiO2 as Enhanced Oil Recovery Chemical(437309).pdf
- Supplementary Materials/
